# Supplementary material
Source: PubMed Central journal article supplement (PMC4193938)
Supplement: embj0033-1073-sd4.pdf [file embj0033-1073-sd4.pdf]

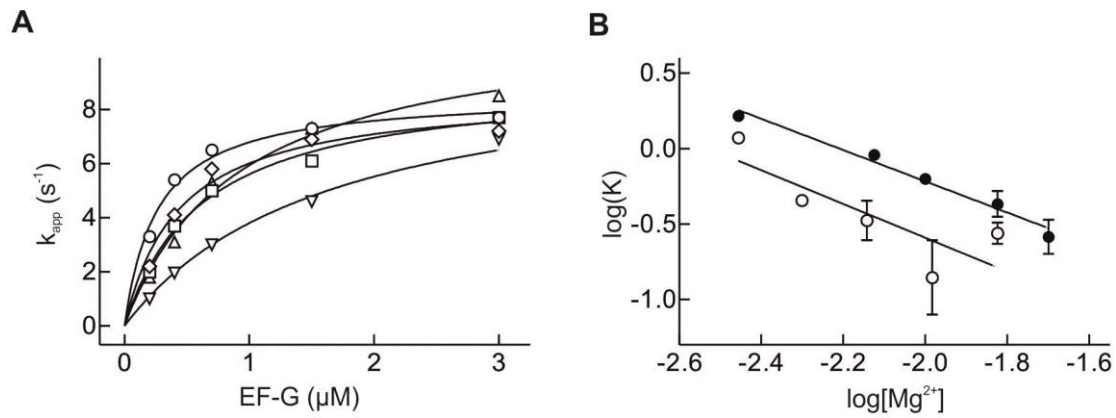

**Supplementary Figure S4** Effect of  $Mg^{2+}$  on 50S translocation.

(A) EF-G-concentration dependence of 50S translocation (23°C).  $Mg^{2+}$  concentration was 3.5 mM ( $\nabla$ ), 7.5 mM ( $\triangle$ ), 10 mM ( $\square$ ), 15 mM ( $\diamond$ ), or 20 mM ( $\circ$ ). The values of  $k_{50S\ TL}$  (rate at saturation) and  $K_{EFG}$  (EF-G concentration at half-saturation) were estimated by hyperbolic fitting.

(B) Linearized dependence of  $K_{EFG}$  (●) on  $Mg^{2+}$ . The dependence of  $K_{HC}$  between hybrid and classical states as recalculated from published data (Kim et al, 2007) is shown for comparison (○). The slopes suggest the participation of one ( $K_{EFG}$ ) or one to two ( $K_{HC}$ ) net  $Mg^{2+}$  ions.

**Supplementary References**

Kim HD, Puglisi JD, Chu S (2007) Fluctuations of transfer RNAs between classical and hybrid states. *Biophys J* **93**: 3575-3582
